# Supplementary material for: Population health status in China: EQ-5D results, by age, sex and socio-economic status, from the National Health Services Survey 2008
Source: Springer Nature journal article supplement (doi:10.1007/s11136-010-9762-x), 2010-11-02
Supplement: MOESM1 [file 272752]

# Online Resource

## Title

Population health status in China: EQ-5D results, by age, sex and socio-economic status, from the National Health Services Survey 2008

## Journal

Quality of Life Research 2010, doi 10.1007/s11136-010-9762-x.

## Authors

**Sun Sun** (corresponding author)

Department of Learning, Informatics, Management and Ethics, Medical Management Centre  
Department of Public Health Sciences, Division of Social Medicine  
Karolinska Institutet  
Nobels väg 15a, 171 77 Stockholm, Sweden  
e-mail: sun.sun@ki.se

**Chen Jiaying** (corresponding author)

School of Health Policy and Management  
Nanjing Medical University  
Hanzhong Rd 140, 210 029 Nanjing, P.R. China  
e-mail: jychen@njmu.edu.cn

**Magnus Johannesson**

Department of Economics, Stockholm School of Economics, Sweden

**Paul Kind**

Centre for Health Economics, University of York, UK

**Xu Ling**

Centre for Health Statistics and Information, Ministry of Health, P.R. China

**Zhang Yaoguang**

Centre for Health Statistics and Information, Ministry of Health, P.R. China

**Kristina Burström**

Department of Learning, Informatics, Management and Ethics  
Department of Public Health Sciences  
Karolinska Institutet, Sweden

**Table 5** Percentage of respondents reporting moderate or severe problems in each EQ-5D dimension [ $\chi^2$  tests were performed between unemployed and employed respondents. All results were statistically significant ( $P<0.05$ )], VAS score (mean), by employment status, age group and sex, China 2008

| EQ-5D Dimension           | Employment status |          |             |          |            |          |
|---------------------------|-------------------|----------|-------------|----------|------------|----------|
|                           | 15-44 years       |          | 45-64 years |          | 65+        |          |
|                           | Unemployed        | Employed | Unemployed  | Employed | Unemployed | Employed |
| <i>Men (n)</i>            | 1,831             | 22,595   | 2,289       | 17,787   | 2,186      | 3,037    |
| <i>Women (n)</i>          | 3,911             | 23,965   | 3,724       | 15,448   | 3,686      | 2,323    |
|                           | %                 | %        | %           | %        | %          | %        |
| <b>Mobility</b>           |                   |          |             |          |            |          |
| Men                       | 4.2               | 1.1      | 10.4        | 3.7      | 25.7       | 13.9     |
| Women                     | 2.2               | 1.2      | 9.4         | 4.9      | 25.6       | 17.0     |
| <b>Self-care</b>          |                   |          |             |          |            |          |
| Men                       | 3.0               | 0.6      | 6.9         | 2.0      | 18.3       | 9.4      |
| Women                     | 1.6               | 0.7      | 6.3         | 2.7      | 19.0       | 11.9     |
| <b>Usual activities</b>   |                   |          |             |          |            |          |
| Men                       | 4.6               | 1.0      | 10.3        | 3.3      | 26.1       | 13.3     |
| Women                     | 2.5               | 1.2      | 8.6         | 4.6      | 25.6       | 16.5     |
| <b>Pain/discomfort</b>    |                   |          |             |          |            |          |
| Men                       | 5.3               | 2.5      | 15.3        | 8.7      | 29.5       | 20.8     |
| Women                     | 4.6               | 3.7      | 17.3        | 13.0     | 32.5       | 25.4     |
| <b>Anxiety/depression</b> |                   |          |             |          |            |          |
| Men                       | 6.2               | 2.7      | 12.2        | 5.8      | 20.8       | 13.4     |
| Women                     | 4.6               | 3.5      | 11.8        | 8.4      | 20.9       | 16.3     |
| <b>VAS score (mean)</b>   |                   |          |             |          |            |          |
| Men                       | 83.4              | 85.9     | 74.0        | 79.5     | 66.4       | 71.3     |
| Women                     | 83.2              | 84.5     | 74.1        | 77.2     | 66.2       | 69.0     |

**Table 6** Percentage of respondents reporting moderate and severe problems in each EQ-5D dimension [ $\chi^2$  tests were performed between respondents who answered ‘yes’ and ‘no’. All results were statistically significant ( $P<0.05$ )], VAS score (mean), by clinical characteristics, age group and sex, China 2008

| EQ-5D Dimension           | Clinical characteristics           |        |             |        |       |       |                                                         |        |             |        |       |       |                                        |        |             |        |      |       |
|---------------------------|------------------------------------|--------|-------------|--------|-------|-------|---------------------------------------------------------|--------|-------------|--------|-------|-------|----------------------------------------|--------|-------------|--------|------|-------|
|                           | Discomfort during the past 2 weeks |        |             |        |       |       | Diagnosed with chronic disease during the past 6 months |        |             |        |       |       | Hospitalised during the past 12 months |        |             |        |      |       |
|                           | 15-44 years                        |        | 45-64 years |        | 65+   |       | 15-44 years                                             |        | 45-64 years |        | 65+   |       | 15-44 years                            |        | 45-64 years |        | 65+  |       |
|                           | Yes                                | No     | Yes         | No     | Yes   | No    | Yes                                                     | No     | Yes         | No     | Yes   | No    | Yes                                    | No     | Yes         | No     | Yes  | No    |
| Men (n)                   | 2,368                              | 24,831 | 5,026       | 17,293 | 3,287 | 5,231 | 1,649                                                   | 25,609 | 5,354       | 17,010 | 3,837 | 4,703 | 762                                    | 26,496 | 1,293       | 21,072 | 955  | 7,585 |
| Women (n)                 | 3,485                              | 27,141 | 6,540       | 16,479 | 3,845 | 4,936 | 2,361                                                   | 28,339 | 6,729       | 16,314 | 4,345 | 4,451 | 2,312                                  | 28,388 | 1,387       | 21,656 | 916  | 7,881 |
|                           | %                                  | %      | %           | %      | %     | %     | %                                                       | %      | %           | %      | %     | %     | %                                      | %      | %           | %      | %    | %     |
| <b>Mobility</b>           |                                    |        |             |        |       |       |                                                         |        |             |        |       |       |                                        |        |             |        |      |       |
| Men                       | 7.8                                | 0.7    | 13.3        | 2.1    | 27.1  | 10.7  | 9.3                                                     | 0.8    | 13.0        | 2.0    | 26.1  | 9.6   | 11.9                                   | 1.0    | 18.5        | 3.8    | 34.4 | 14.8  |
| Women                     | 6.1                                | 0.6    | 13.5        | 2.3    | 29.1  | 12.7  | 7.9                                                     | 0.7    | 13.3        | 2.2    | 27.8  | 12.2  | 4.1                                    | 1.0    | 16.6        | 4.7    | 34.4 | 18.2  |
| <b>Self-care</b>          |                                    |        |             |        |       |       |                                                         |        |             |        |       |       |                                        |        |             |        |      |       |
| Men                       | 4.9                                | 0.3    | 8.1         | 1.2    | 17.9  | 7.2   | 5.5                                                     | 0.4    | 8.3         | 1.0    | 17.6  | 6.2   | 8.1                                    | 0.5    | 12.8        | 2.1    | 23.9 | 9.7   |
| Women                     | 3.8                                | 0.4    | 8.0         | 1.2    | 20.0  | 8.8   | 5.1                                                     | 0.4    | 8.1         | 1.1    | 18.6  | 8.9   | 2.6                                    | 0.6    | 11.7        | 2.6    | 23.6 | 12.6  |
| <b>Usual activities</b>   |                                    |        |             |        |       |       |                                                         |        |             |        |       |       |                                        |        |             |        |      |       |
| Men                       | 8.1                                | 0.5    | 12.7        | 1.7    | 25.7  | 10.1  | 9.8                                                     | 0.6    | 12.4        | 1.6    | 24.8  | 9.0   | 11.6                                   | 0.9    | 19.0        | 3.3    | 31.7 | 14.1  |
| Women                     | 7.0                                | 0.5    | 12.7        | 1.9    | 27.7  | 12.1  | 9.2                                                     | 0.6    | 12.5        | 1.9    | 25.9  | 12.1  | 4.4                                    | 1.0    | 17.5        | 4.2    | 32.6 | 17.3  |
| <b>Pain/discomfort</b>    |                                    |        |             |        |       |       |                                                         |        |             |        |       |       |                                        |        |             |        |      |       |
| Men                       | 19.9                               | 0.9    | 29.2        | 3.8    | 37.9  | 11.1  | 22.1                                                    | 1.3    | 25.9        | 4.3    | 34.1  | 11.0  | 16.5                                   | 2.1    | 28.4        | 8.4    | 36.4 | 19.5  |
| Women                     | 22.0                               | 1.2    | 33.4        | 5.2    | 42.3  | 14.9  | 25.7                                                    | 1.8    | 30.6        | 6.0    | 39.1  | 15.1  | 7.9                                    | 3.3    | 29.8        | 12.1   | 42.1 | 25.2  |
| <b>Anxiety/depression</b> |                                    |        |             |        |       |       |                                                         |        |             |        |       |       |                                        |        |             |        |      |       |
| Men                       | 11.8                               | 1.8    | 16.4        | 3.6    | 22.2  | 7.6   | 14.9                                                    | 1.9    | 15.7        | 3.6    | 20.6  | 7.2   | 14.3                                   | 2.4    | 19.7        | 5.7    | 23.1 | 12.0  |
| Women                     | 13.6                               | 2.2    | 19.0        | 4.3    | 24.4  | 9.6   | 18.0                                                    | 2.2    | 18.5        | 4.4    | 22.8  | 9.5   | 6.4                                    | 3.2    | 22.0        | 7.6    | 25.9 | 15.0  |
| <b>VAS score (mean)</b>   |                                    |        |             |        |       |       |                                                         |        |             |        |       |       |                                        |        |             |        |      |       |
| Men                       | 77.6                               | 86.9   | 70.6        | 80.9   | 65.2  | 73.2  | 74.2                                                    | 86.9   | 70.4        | 81.2   | 65.4  | 74.0  | 77.0                                   | 86.4   | 68.7        | 79.2   | 62.6 | 71.1  |
| Women                     | 75.6                               | 86.0   | 69.4        | 79.3   | 64.2  | 71.4  | 72.2                                                    | 85.8   | 69.0        | 79.6   | 64.5  | 71.9  | 82.5                                   | 85.0   | 67.9        | 77.0   | 62.5 | 68.9  |

Online resource to article: Sun, S., Chen, J., Johannesson, M., Kind, P., Xu, L., Zhang, Y., & Burström, K. (2010). Population health status in China: EQ-5D results, by age, sex and socio-economic status, from the National Health Services Survey 2008. Quality of Life Research. doi 10.1007/s11136-010-9762-x.

**Table 7** Multiple regression analyses on VAS score, on sex, age group, educational level, income group and employment status, China 2008

|                                       | Model 1           |         | Model 2           |         | Model 3           |         | Model 4           |         | Model 5           |         | Model 6           |         |
|---------------------------------------|-------------------|---------|-------------------|---------|-------------------|---------|-------------------|---------|-------------------|---------|-------------------|---------|
|                                       | $\beta$ -estimate | p-value |
| <b>Intercept</b>                      | 90.544            | <0.001  | 86.576            | <0.001  | 88.333            | <0.001  | 85.826            | <0.001  | 90.281            | <0.001  | 85.295            | <0.001  |
| <b>Sex<sup>a</sup></b>                | -1.678            | <0.001  | -1.175            | <0.001  | -1.703            | <0.001  | -1.357            | <0.001  | -1.474            | <0.001  | -1.045            | <0.001  |
| <b>Age group<sup>b</sup></b>          |                   |         |                   |         |                   |         |                   |         |                   |         |                   |         |
| 20-24                                 | -1.161            | <0.001  | -1.099            | <0.001  | -1.335            | <0.001  | -1.240            | <0.001  | -0.717            | 0.005   | -0.968            | <0.001  |
| 25-29                                 | -2.403            | <0.001  | -2.221            | <0.001  | -2.711            | <0.001  | -2.538            | <0.001  | -1.946            | <0.001  | -2.296            | <0.001  |
| 30-34                                 | -4.288            | <0.001  | -3.867            | <0.001  | -4.440            | <0.001  | -4.191            | <0.001  | -3.824            | <0.001  | -3.899            | <0.001  |
| 35-39                                 | -5.714            | <0.001  | -5.118            | <0.001  | -5.887            | <0.001  | -5.555            | <0.001  | -5.272            | <0.001  | -5.265            | <0.001  |
| 40-44                                 | -7.237            | <0.001  | -6.569            | <0.001  | -7.489            | <0.001  | -7.109            | <0.001  | -6.773            | <0.001  | -6.784            | <0.001  |
| 45-49                                 | -9.398            | <0.001  | -8.691            | <0.001  | -9.756            | <0.001  | -9.278            | <0.001  | -8.891            | <0.001  | -8.867            | <0.001  |
| 50-54                                 | -11.420           | <0.001  | -10.293           | <0.001  | -11.714           | <0.001  | -10.984           | <0.001  | -10.937           | <0.001  | -10.294           | <0.001  |
| 55-59                                 | -13.419           | <0.001  | -11.968           | <0.001  | -13.608           | <0.001  | -12.709           | <0.001  | -12.956           | <0.001  | -11.803           | <0.001  |
| 60-64                                 | -15.743           | <0.001  | -14.211           | <0.001  | -15.830           | <0.001  | -14.863           | <0.001  | -15.187           | <0.001  | -13.604           | <0.001  |
| 65-69                                 | -18.347           | <0.001  | -16.614           | <0.001  | -18.442           | <0.001  | -17.290           | <0.001  | -17.622           | <0.001  | -15.654           | <0.001  |
| 70-74                                 | -20.429           | <0.001  | -18.384           | <0.001  | -20.619           | <0.001  | -19.218           | <0.001  | -19.419           | <0.001  | -17.134           | <0.001  |
| 75-79                                 | -22.046           | <0.001  | -19.778           | <0.001  | -22.263           | <0.001  | -20.687           | <0.001  | -20.927           | <0.001  | -18.391           | <0.001  |
| 80-84                                 | -23.827           | <0.001  | -21.410           | <0.001  | -24.064           | <0.001  | -22.380           | <0.001  | -22.486           | <0.001  | -19.885           | <0.001  |
| 85+                                   | -24.543           | <0.001  | -21.895           | <0.001  | -24.623           | <0.001  | -22.810           | <0.001  | -22.911           | <0.001  | -20.209           | <0.001  |
| <b>Socio-economic status</b>          |                   |         |                   |         |                   |         |                   |         |                   |         |                   |         |
| <b>Level of education<sup>c</sup></b> |                   |         |                   |         |                   |         |                   |         |                   |         |                   |         |
| Primary school                        | -                 | -       | 2.097             | <0.001  | -                 | -       | 1.735             | <0.001  | -                 | -       | 1.857             | <0.001  |
| Junior middle school                  | -                 | -       | 3.810             | <0.001  | -                 | -       | 2.905             | <0.001  | -                 | -       | 3.268             | <0.001  |
| Senior middle school                  | -                 | -       | 3.908             | <0.001  | -                 | -       | 2.411             | <0.001  | -                 | -       | 2.935             | <0.001  |
| College and above                     | -                 | -       | 4.277             | <0.001  | -                 | -       | 2.127             | <0.001  | -                 | -       | 2.397             | <0.001  |
| Level of education missing            | -                 | -       | 3.299             | 0.010   | -                 | -       | 2.655             | 0.038   | -                 | -       | 4.058             | 0.002   |
| <b>Income<sup>d</sup></b>             |                   |         |                   |         |                   |         |                   |         |                   |         |                   |         |
| Second group                          | -                 | -       | -                 | -       | 1.978             | <0.001  | 1.788             | <0.001  | -                 | -       | 1.819             | <0.001  |
| Third group                           | -                 | -       | -                 | -       | 2.598             | <0.001  | 2.320             | <0.001  | -                 | -       | 2.397             | <0.001  |
| Fourth group                          | -                 | -       | -                 | -       | 3.928             | <0.001  | 3.493             | <0.001  | -                 | -       | 3.702             | <0.001  |
| Fifth group (high)                    | -                 | -       | -                 | -       | 4.298             | <0.001  | 3.732             | <0.001  | -                 | -       | 4.014             | <0.001  |
| <b>Employment status<sup>e</sup></b>  |                   |         |                   |         |                   |         |                   |         |                   |         |                   |         |
| Retired                               | -                 | -       | -                 | -       | -                 | -       | -                 | -       | 0.403             | 0.003   | -2.516            | <0.001  |
| Student                               | -                 | -       | -                 | -       | -                 | -       | -                 | -       | 0.544             | 0.037   | 0.113             | 0.665   |
| Unemployed                            | -                 | -       | -                 | -       | -                 | -       | -                 | -       | -2.837            | <0.001  | -3.029            | <0.001  |
| Employment status missing             | -                 | -       | -                 | -       | -                 | -       | -                 | -       | -6.209            | <0.001  | -5.394            | <0.001  |
| <b>R-Square</b>                       |                   |         |                   |         |                   |         |                   |         |                   |         |                   |         |
| <b>Adj R-Square</b>                   |                   | 0.200   |                   | 0.208   |                   | 0.212   |                   | 0.216   |                   | 0.205   |                   | 0.221   |
|                                       |                   | 0.199   |                   | 0.207   |                   | 0.212   |                   | 0.216   |                   | 0.205   |                   | 0.221   |
| <b>Observation number</b>             |                   | 120,703 |                   | 120,703 |                   | 120,703 |                   | 120,703 |                   | 120,703 |                   | 120,703 |

<sup>a</sup>Coded: men=0; women=1

<sup>b</sup>Base line category: age group 15-19 years

<sup>c</sup>Base line category: below primary school

<sup>d</sup>Base line category: first group (low)

<sup>e</sup>Base line category: employed

Online resource to article: Sun, S., Chen, J., Johannesson, M., Kind, P., Xu, L., Zhang, Y., & Burström, K. (2010). Population health status in China: EQ-5D results, by age, sex and socio-economic status, from the National Health Services Survey 2008. Quality of Life Research. doi 10.1007/s11136-010-9762-x.

**Table 8** Multiple regression analyses on VAS score, on sex, age group and clinical characteristics, China 2008

|                                                                      | Model 1           |         | Model 2           |         | Model 3           |         |
|----------------------------------------------------------------------|-------------------|---------|-------------------|---------|-------------------|---------|
|                                                                      | $\beta$ -estimate | p-value | $\beta$ -estimate | p-value | $\beta$ -estimate | p-value |
| <b>Intercept</b>                                                     | 90.851            | <0.001  | 90.541            | <0.001  | 90.618            | <0.001  |
| <b>Sex <sup>a</sup></b>                                              | -1.297            | <0.001  | -1.333            | <0.001  | -1.525            | <0.001  |
| <b>Age group <sup>b</sup></b>                                        |                   |         |                   |         |                   |         |
| 20-24                                                                | -1.196            | <0.001  | -1.094            | <0.001  | -0.644            | 0.003   |
| 25-29                                                                | -2.334            | <0.001  | -2.264            | <0.001  | -2.004            | <0.001  |
| 30-34                                                                | -3.998            | <0.001  | -3.870            | <0.001  | -4.028            | <0.001  |
| 35-39                                                                | -5.152            | <0.001  | -5.046            | <0.001  | -5.554            | <0.001  |
| 40-44                                                                | -6.394            | <0.001  | -6.173            | <0.001  | -7.139            | <0.001  |
| 45-49                                                                | -8.192            | <0.001  | -7.731            | <0.001  | -9.234            | <0.001  |
| 50-54                                                                | -9.773            | <0.001  | -9.155            | <0.001  | -11.198           | <0.001  |
| 55-59                                                                | -11.410           | <0.001  | -10.617           | <0.001  | -13.142           | <0.001  |
| 60-64                                                                | -13.286           | <0.001  | -12.157           | <0.001  | -15.327           | <0.001  |
| 65-69                                                                | -15.582           | <0.001  | -14.301           | <0.001  | -17.842           | <0.001  |
| 70-74                                                                | -17.208           | <0.001  | -15.759           | <0.001  | -19.846           | <0.001  |
| 75-79                                                                | -18.539           | <0.001  | -17.122           | <0.001  | -21.313           | <0.001  |
| 80-84                                                                | -20.226           | <0.001  | -18.711           | <0.001  | -23.159           | <0.001  |
| 85+                                                                  | -20.985           | <0.001  | -19.959           | <0.001  | -23.938           | <0.001  |
| <b>Clinical characteristics</b>                                      |                   |         |                   |         |                   |         |
| Discomfort during the past 2 weeks <sup>c</sup>                      | -8.916            | <0.001  | -                 | -       | -                 | -       |
| Discomfort during the past 2 weeks missing                           | -0.178            | 0.820   | -                 | -       | -                 | -       |
| Diagnosed with chronic disease during the past 6 months <sup>d</sup> | -                 | -       | -9.979            | <0.001  | -                 | -       |
| Hospitalised during the past 12 months <sup>e</sup>                  | -                 | -       | -                 | -       | -6.899            | <0.001  |
| <b>R-Square</b>                                                      |                   | 0.259   |                   | 0.269   |                   | 0.214   |
| <b>Adjusted R-Square</b>                                             |                   | 0.259   |                   | 0.269   |                   | 0.214   |
| <b>Observation number</b>                                            |                   | 120,703 |                   | 120,701 |                   | 120,703 |

<sup>a</sup>Coded: men=0; women=1

<sup>b</sup>Base line category: age group 15-19 years

<sup>c</sup>Base line category: respondents without discomfort during the past 2 weeks

<sup>d</sup>Base line category: respondents without chronic disease during the past 6 months

<sup>e</sup>Base line category: respondents without hospitalised during the past 12 months
